# Supplementary material for: LMO1 gene polymorphisms contribute to decreased neuroblastoma susceptibility in a Southern Chinese population
Source: PubMed Central journal article supplement (PMC5008399; doi:10.18632/oncotarget.8178), 2016-03-18
Supplement: oncotarget-07-22770-s001.pdf [file oncotarget-07-22770-s001.pdf]

# ***LMO1* gene polymorphisms contribute to decreased neuroblastoma susceptibility in a Southern Chinese population**

**Supplementary Materials**

**Supplementary Table S1: SNPs captured by the four GWAS identified SNPs as predicted by SNPinfo (http://snpinf.niehs.nih.gov/) software**

| rs <sup>a</sup>   | Chr | Allele | LDsnp                | Pop/LD              | TFBS | Splicing<br>(ESE or<br>ESS) | miRNA<br>(miRanda) | nsSNP | Reg<br>Potential | Conservation | Nearby Gene | Distance (bp) | Allele | Asian | CHB   |
|-------------------|-----|--------|----------------------|---------------------|------|-----------------------------|--------------------|-------|------------------|--------------|-------------|---------------|--------|-------|-------|
| <b>rs10840002</b> | 11  | A/G    | rs10840002 rs4758051 | 1 CHB/0.825         | —    | —                           | —                  | —     | 0.103058         | 0            | RIC3  LMO1  | -52454  -2831 | A      | 0.5   | 0.47  |
| <b>rs110419</b>   | 11  | A/G    | rs110419             | 1                   | —    | —                           | —                  | —     | 0                | 0            | LMO1        | 6996 32553    | A      | 0.634 | 0.53  |
| rs1110420         | 11  | C/T    | rs1110419            | CHB/1.000           | —    | —                           | —                  | —     | 0                | 0            | LMO1        | 7192 32357    | T      | 0.491 | 0.545 |
| rs204926          | 11  | G/A    | rs1110419            | CHB/0.607           | —    | —                           | —                  | —     | 0                | 0            | LMO1        | 9249 30300    | G      | 0.64  | 0.628 |
| rs204928          | 11  | G/A    | rs1110419            | CHB/0.906           | —    | —                           | —                  | —     | 0                | 0.001        | LMO1        | 8576 30973    | A      | 0.614 | 0.568 |
| rs3750952         | 11  | G/C    | rs1110419            | CHB/0.780           | —    | Y                           | —                  | —     | 0.524312         | 1            | LMO1        | 6064 33485    | G      | 0.632 | 0.614 |
| rs4758317         | 11  | A/C    | rs1110419            | CHB/0.976           | —    | —                           | —                  | —     | 0                | 0            | LMO1        | 4954 34595    | A      | 0.394 | 0.464 |
| rs204937          | 11  | T/C    | rs204938             | CHB/0.804           | —    | —                           | —                  | —     | 0.232693         | 0            | LMO1        | 3508  4468    | T      | 0.844 | 0.851 |
| <b>rs204938</b>   | 11  | T/C    | rs204938             | 1                   | —    | —                           | —                  | —     | 0.278185         | 0            | LMO1        | 32340  7209   | C      | 0.211 | 0.179 |
| rs2061037         | 11  | A/G    | rs204938             | CHB/0.676           | —    | —                           | —                  | —     | 0                | 0            | LMO1        | 20772  18777  | G      | 0.833 | 0.827 |
| rs484161          | 11  | C/T    | rs204938             | CHB/0.648           | —    | —                           | —                  | —     | 0.373993         | 0            | LMO1        | 18668 20881   | T      | 0.18  | 0.202 |
| rs10840000        | 11  | C/G    | rs4758051 rs10840002 | CHB/0.950 CHB/0.756 | —    | —                           | —                  | —     | 0.106824         | 0            | RIC3  LMO1  | -49541  -5744 | C      | 0.506 | 0.571 |
| rs4758050         | 11  | C/G    | rs4758051 rs10840002 | CHB/1.000 CHB/0.829 | —    | —                           | —                  | —     | 0.067678         | 0            | RIC3  LMO1  | -47973  -7312 | G      | 0.534 | 0.478 |
| <b>rs4758051</b>  | 11  | A/G    | rs4758051 rs10840002 | 1 CHB/0.825         | —    | —                           | —                  | —     | 0                | 0            | RIC3  LMO1  | -48067  -7218 | G      | 0.528 | 0.518 |

SNP, single nucleotide polymorphism; GWAS, genome-wide association study; LD, linkage disequilibrium; TFBS, transcription factor binding sites; ESE, exon *splicing* enhancer; ESS, exon *splicing* silencer; CHB, Han Chinese in Beijing, China

<sup>a</sup>The rs in bold were discovered by previous genome-wide association study.
